# Supplementary material for: Characteristics and Predictive Value of Blood Transcriptome Signature in Males with Autism Spectrum Disorders
Source: PLoS One. 2012 Dec 5;7(12):e49475. doi: 10.1371/journal.pone.0049475 (PMC3515554; doi:10.1371/journal.pone.0049475)
Supplement: Table S1 — Differentially expressed genes in P1. We used Welch's t-test for two groups comparison, and one-way analysis of variance with Dunnett's post hoc tests to find significantly changed genes in autistic disorder (AUT), PDD-NOS (PDDNOS), or Asperger's disorder (ASP) compared to control group. We corrected p values for the multiple comparisons by calculating a false discovery rate (FDR). (XLS) [file pone.0049475.s005.xls]

## Sheet: Sheet1
Table S1. Differentially expressed genes in P1.
Affymetrix ID	Gene	p-value	FDR	p-value	FDR	p-value	FDR	p-value	FDR
				(AUT vs. Control)	(AUT vs. Control)	(PDDNOS vs. Control)	(PDDNOS vs. Control)	(ASP vs. Control)	(ASP vs. Control)
8177137	UTY	4.417e-07	0.001091	5.673e-06	0.01935	0.000163	0.1627	0.05572	1
7931353	PTPRE	5.502e-07	0.001091	0.0003422	0.05595	6.404e-05	0.1627	0.0004151	1
8152988	SLA	6.5e-07	0.001091	0.0001011	0.04183	0.0001776	0.1627	0.00181	1
7975361	KIAA0247	8.956e-07	0.001091	5.694e-05	0.036	0.0001157	0.1627	0.02974	1
8066822	SULF2	9.252e-07	0.001091	0.0001092	0.04183	8.555e-05	0.1627	0.01431	1
8138116	ZNF12	1.003e-06	0.001091	7.493e-07	0.00978	0.0003228	0.1758	0.4296	1
8051814	ZFP36L2	1.129e-06	0.001091	1.074e-05	0.02441	0.0002233	0.1627	0.1764	1
8151149	ARFGEF1	1.157e-06	0.001091	9.84e-06	0.02441	0.0001378	0.1627	0.2269	1
7995631	RBL2	1.692e-06	0.001269	1.434e-06	0.00978	0.0001846	0.1627	0.6884	1
8059596	TRIP12	1.759e-06	0.001269	5.151e-05	0.036	0.0003796	0.1768	0.0328	1
7987048	MTMR10	1.85e-06	0.001269	0.0001126	0.04183	9.313e-05	0.1627	0.06821	1
7929719	C10orf28	2.905e-06	0.001828	4.622e-05	0.036	0.0001598	0.1627	0.226	1
8115562	RNF145	3.517e-06	0.001836	1.538e-05	0.02493	0.0002551	0.1627	0.4539	1
8093976	TBC1D14	3.882e-06	0.001836	0.001021	0.07694	0.0001744	0.1627	0.004688	1
7922889	IVNS1ABP	4.035e-06	0.001836	3.114e-05	0.0354	0.0003889	0.1768	0.2558	1
8138670	HNRNPA2B1	4.089e-06	0.001836	1.948e-05	0.02498	0.001718	0.2383	0.0982	1
8059770	TIGD1	4.134e-06	0.001836	6.862e-05	0.036	0.0001918	0.1627	0.2616	1
8120992	ZNF292	4.536e-06	0.001902	3.717e-06	0.0169	0.001927	0.2384	0.3219	1
8054135	MGAT4A	5.378e-06	0.002137	5.577e-05	0.036	0.0002454	0.1627	0.3327	1
7957277	ZDHHC17	5.866e-06	0.002214	9.908e-05	0.04183	0.0008332	0.2229	0.08174	1
8043310	RMND5A	6.235e-06	0.002241	0.001423	0.08466	3.588e-05	0.1627	0.07715	1
8066417	SERINC3	6.565e-06	0.002253	6.775e-05	0.036	0.0002249	0.1627	0.4116	1
8003263	ZCCHC14	6.927e-06	0.002273	8.767e-05	0.03987	0.0001281	0.1627	0.4914	1
8073733	NUP50	8.267e-06	0.002463	7.331e-05	0.03654	0.000521	0.2031	0.2903	1
8128394	PNISR	8.889e-06	0.002463	2.014e-05	0.02498	0.001033	0.2383	0.4726	1
8065776	NCOA6	8.941e-06	0.002463	7.5e-05	0.03654	0.0007022	0.2212	0.2724	1
8060418	SIRPA	9.081e-06	0.002463	0.0003902	0.05696	0.0005632	0.212	0.0601	1
8126018	STK38	9.137e-06	0.002463	5.748e-05	0.036	0.001446	0.2383	0.1994	1
7969651	DNAJC3	9.525e-06	0.002479	0.001576	0.08812	0.0002682	0.1627	0.01538	1
7989224	ADAM10	1.028e-05	0.002523	0.0001135	0.04183	0.001433	0.2383	0.1246	1
8068238	IFNAR2	1.059e-05	0.002523	0.0003661	0.05595	0.0004412	0.1824	0.1161	1
8155898	PCSK5	1.101e-05	0.002523	4.529e-05	0.036	0.0007142	0.2212	0.4958	1
8144082	C7orf13	1.103e-05	0.002523	0.0004556	0.05809	0.0001348	0.1627	0.2818	1
8112687	COL4A3BP	1.227e-05	0.002725	0.0003665	0.05595	0.000746	0.2212	0.0882	1
8009205	DDX42	1.432e-05	0.002856	1.644e-05	0.02493	0.002239	0.241	0.5261	1
8171762	RPS6KA3	1.432e-05	0.002856	0.0003773	0.05595	0.0004168	0.18	0.1991	1
8143988	MLL3	1.433e-05	0.002856	0.0001973	0.05196	0.001817	0.2383	0.09309	1
7988921	MYO5A	1.438e-05	0.002856	0.0002864	0.05495	0.0006789	0.2212	0.1707	1
8022441	ROCK1	1.478e-05	0.00286	6.595e-05	0.036	0.003804	0.2706	0.1206	1
8048980	CAB39	1.656e-05	0.003069	8.724e-05	0.03987	0.00156	0.2383	0.3342	1
8090893	MSL2	1.667e-05	0.003069	0.001508	0.08673	0.0003691	0.1768	0.05291	1
7974066	PNN	1.815e-05	0.003112	1.626e-05	0.02493	0.003167	0.2558	0.5266	1
8157534	CNTRL	1.872e-05	0.003112	0.0001072	0.04183	0.001217	0.2383	0.361	1
8079140	SNRK	1.898e-05	0.003112	0.0004342	0.05735	0.0009348	0.2383	0.1356	1
8144317	KBTBD11	1.927e-05	0.003112	0.0002463	0.05313	0.0001279	0.1627	0.7561	1
8079462	NBEAL2	1.967e-05	0.003112	0.003075	0.1107	0.001477	0.2383	0.001159	1
8050128	KIDINS220	1.988e-05	0.003112	0.0003281	0.05595	0.002784	0.2518	0.06124	1
7911038	ZNF238	1.999e-05	0.003112	4.167e-05	0.036	0.001564	0.2383	0.6198	1
8119408	NFYA	2.064e-05	0.003112	0.0009081	0.07359	0.0002487	0.1627	0.2321	1
8119529	UBR2	2.101e-05	0.003112	0.000866	0.07324	0.0002674	0.1627	0.2376	1
8013965	SSH2	2.132e-05	0.003112	0.005606	0.1403	0.0002742	0.1627	0.009314	1
7950409	KCNE3	2.144e-05	0.003112	0.0008796	0.07324	0.001544	0.2383	0.03592	1
7924603	LBR	2.269e-05	0.003232	0.0003632	0.05595	0.001623	0.2383	0.1342	1
8174119	ZMAT1	2.377e-05	0.003324	3.832e-05	0.036	0.002385	0.241	0.5808	1
8060627	ATRN	2.435e-05	0.003341	0.000153	0.04519	0.0009548	0.2383	0.4788	1
8104944	NIPBL	2.548e-05	0.003435	0.0001299	0.0435	0.00258	0.2448	0.2779	1
7925622	AHCTF1	2.769e-05	0.003654	0.001784	0.09197	0.0003371	0.1758	0.1451	1
7973298	TRAV8-3	2.808e-05	0.003654	0.0003744	0.05595	0.001702	0.2383	0.1797	1
7953291	CD9	2.865e-05	0.003666	0.0005348	0.06235	0.0009636	0.2383	0.2236	1
7939197	HIPK3	2.97e-05	0.003737	0.002021	0.09508	0.0003479	0.1758	0.1362	1
8169541	DOCK11	3.204e-05	0.003965	6.086e-05	0.036	0.002367	0.241	0.6122	1
8132188	AVL9	3.387e-05	0.004047	0.0002311	0.05313	0.001119	0.2383	0.4837	1
8042337	ACTR2	3.47e-05	0.004047	0.0005056	0.06235	0.004588	0.2782	0.05213	1
7999044	CREBBP	3.472e-05	0.004047	0.0006236	0.06594	0.002037	0.2406	0.1325	1
8042942	HK2	3.485e-05	0.004047	0.0004227	0.05735	0.006774	0.302	0.03975	1
7968035	SPATA13	3.572e-05	0.004073	0.0003566	0.05595	0.005894	0.3013	0.0652	1
8106602	ZFYVE16	3.615e-05	0.004073	0.0006618	0.06617	0.003508	0.2688	0.0642	1
7950796	CREBZF	3.746e-05	0.004158	4.964e-05	0.036	0.003724	0.2688	0.6082	1
7954711	C12orf35	3.847e-05	0.004168	0.002185	0.09773	0.003083	0.2556	0.009418	1
7963244	TFCP2	3.865e-05	0.004168	0.001599	0.08867	0.0006656	0.2212	0.1666	1
8011542	ZZEF1	3.932e-05	0.004181	0.0002337	0.05313	0.001167	0.2383	0.5894	1
8111698	RICTOR	4.065e-05	0.004262	0.001862	0.09213	0.001958	0.2385	0.03851	1
7938179	OR10A4	4.257e-05	0.004402	0.007336	0.1565	0.0005749	0.212	0.016	1
8101260	ANTXR2	4.555e-05	0.004565	0.0007085	0.06712	0.002069	0.241	0.1779	1
8109843	DOCK2	4.579e-05	0.004565	0.001148	0.08112	0.00314	0.2558	0.06035	1
8163775	MEGF9	4.637e-05	0.004565	0.008905	0.174	0.001629	0.2383	0.001446	1
8023882	ZNF516	4.656e-05	0.004565	0.001576	0.08812	0.001267	0.2383	0.1228	1
8058927	TMBIM1	4.836e-05	0.00468	0.0005951	0.06443	0.001162	0.2383	0.4167	1
8031737	ZNF548	4.914e-05	0.004696	0.000356	0.05595	0.002141	0.241	0.3939	1
8116247	ZNF354A	5.019e-05	0.004736	0.00029	0.05495	0.003006	0.254	0.3559	1
8117663	NKAPL	5.224e-05	0.004839	0.008708	0.1722	0.0002977	0.1692	0.05358	1
8045398	RAB3GAP1	5.281e-05	0.004839	0.002747	0.1066	0.004193	0.2733	0.009278	1
8122464	UTRN	5.323e-05	0.004839	0.0009699	0.0756	0.005972	0.3013	0.04178	1
8161701	TMEM2	5.385e-05	0.004839	0.001609	0.08886	0.002632	0.2459	0.06625	1
8152148	UBR5	5.716e-05	0.005003	0.0005697	0.06443	0.001464	0.2383	0.4441	1
7970301	TMCO3	5.818e-05	0.005003	0.0004448	0.05735	0.002851	0.2521	0.3266	1
7927389	MAPK8	5.964e-05	0.005003	0.0001629	0.04629	0.00194	0.2384	0.7483	1
8167971	MIR223	5.968e-05	0.005003	0.003739	0.1201	0.005027	0.2894	0.004056	1
7965123	PPP1R12A	5.99e-05	0.005003	0.0002515	0.05313	0.006397	0.3013	0.2637	1
8127637	TMEM30A	6.017e-05	0.005003	0.0001339	0.0435	0.007255	0.3064	0.3966	1
8097148	KIAA1109	6.031e-05	0.005003	0.0006421	0.06617	0.007063	0.3048	0.08549	1
7916592	MYSM1	6.305e-05	0.005173	0.00035	0.05595	0.003485	0.2688	0.388	1
8117106	RNF144B	6.419e-05	0.00521	0.00613	0.1462	0.001913	0.2384	0.0122	1
8025978	ZNF763	6.532e-05	0.005245	0.001877	0.09213	0.001901	0.2384	0.1362	1
8040695	KCNK3	6.738e-05	0.005272	0.005165	0.1355	0.002185	0.241	0.01785	1
7930682	FAM160B1	6.777e-05	0.005272	0.001383	0.08459	0.001799	0.2383	0.21	1
8077528	SETD5	6.906e-05	0.005272	0.001833	0.09213	0.002089	0.241	0.1344	1
8053775	ZNF514	6.916e-05	0.005272	0.003352	0.1143	0.002453	0.2443	0.03865	1
8059783	NGEF	7.074e-05	0.005272	0.001435	0.08466	0.001048	0.2383	0.3492	1
7986132	MAN2A2	7.207e-05	0.005272	0.001358	0.08459	0.000796	0.2229	0.4665	1
7933877	JMJD1C	7.259e-05	0.005272	0.0009215	0.07359	0.003531	0.2688	0.2089	1
7927062	ZNF33A	7.331e-05	0.005272	0.0001037	0.04183	0.001886	0.2384	0.9717	1
8070826	ITGB2	7.384e-05	0.005272	0.002866	0.107	0.004939	0.2894	0.02155	1
8007023	MSL1	7.509e-05	0.005272	0.008398	0.1702	0.001383	0.2383	0.01894	1
7905789	IL6R	7.51e-05	0.005272	0.002258	0.09935	0.004815	0.2894	0.03583	1
7957806	SCYL2	7.526e-05	0.005272	0.001221	0.08193	0.00311	0.2556	0.1722	1
8021496	KIAA1468	7.527e-05	0.005272	0.0003053	0.05595	0.004304	0.2733	0.4422	1
8091009	PIK3CB	7.543e-05	0.005272	0.001237	0.08193	0.001746	0.2383	0.3102	1
7968274	PAN3	7.89e-05	0.005432	0.000223	0.05313	0.004136	0.2733	0.5832	1
8008834	CLTC	8.057e-05	0.005432	0.0001816	0.04956	0.004088	0.2733	0.6522	1
7948667	AHNAK	8.217e-05	0.005432	0.0003769	0.05595	0.01254	0.3653	0.1309	1
8122343	HECA	8.309e-05	0.005432	0.0001472	0.04463	0.004186	0.2733	0.7267	1
8132531	SPDYE1	8.318e-05	0.005432	0.004123	0.1241	0.00145	0.2383	0.09949	1
7969796	TM9SF2	8.351e-05	0.005432	0.01018	0.183	0.001487	0.2383	0.01412	1
8067113	ZNF217	8.392e-05	0.005432	0.002844	0.107	0.002524	0.2448	0.09011	1
7983953	RNF111	8.483e-05	0.005432	0.0003954	0.05696	0.001576	0.2383	0.7611	1
8164398	GOLGA2	8.487e-05	0.005432	0.001797	0.09197	0.0006951	0.2212	0.4913	1
8124059	NUP153	8.491e-05	0.005432	0.0006792	0.06617	0.002373	0.241	0.47	1
8171248	KAL1	8.791e-05	0.005577	0.0003557	0.05595	0.01016	0.3402	0.2127	1
8152962	LRRC6	8.866e-05	0.005577	0.001848	0.09213	0.001708	0.2383	0.2662	1
8115927	RNF44	9.048e-05	0.005642	5.91e-05	0.036	0.003646	0.2688	0.975	1
8110546	MAML1	9.117e-05	0.005642	0.0002123	0.05313	0.003931	0.2709	0.6939	1
8074791	MAPK1	9.71e-05	0.00592	0.001281	0.08285	0.002212	0.241	0.3531	1
7971422	ZC3H13	9.725e-05	0.00592	0.001211	0.08193	0.001735	0.2383	0.4355	1
8158597	GPR107	9.903e-05	0.00598	0.00168	0.09035	0.0008137	0.2229	0.5604	1
8011945	KIAA0753	0.0001021	0.006117	0.0003652	0.05595	0.001318	0.2383	0.9054	1
8041713	PPM1B	0.0001033	0.006138	0.0004171	0.05735	0.006687	0.3018	0.385	1
7897482	PIK3CD	0.0001046	0.00617	0.001641	0.08988	0.00248	0.2448	0.2947	1
8107356	DCP2	0.0001077	0.006305	0.0008118	0.07191	0.0068	0.3021	0.2212	1
8082688	DNAJC13	0.0001089	0.006306	0.0009224	0.07359	0.01058	0.3429	0.114	1
8165077	NACC2	0.0001113	0.006306	0.001435	0.08466	0.003174	0.2558	0.2947	1
7897441	H6PD	0.0001115	0.006306	0.002172	0.09773	0.001624	0.2383	0.341	1
7994161	RBBP6	0.0001119	0.006306	0.0001318	0.0435	0.009558	0.34	0.6694	1
7954436	LRMP	0.0001125	0.006306	0.001983	0.0941	0.002554	0.2448	0.2554	1
8027439	ZNF507	0.0001128	0.006306	0.0004019	0.05711	0.0004222	0.18	0.9994	1
8080878	ATXN7	0.0001141	0.006335	0.001299	0.0836	0.02657	0.4521	0.01017	1
7952739	ZBTB44	0.0001155	0.006344	0.000147	0.04463	0.006843	0.3021	0.7556	1
7932911	KIF5B	0.0001163	0.006344	0.0004456	0.05735	0.01339	0.3697	0.2244	1
8006123	CPD	0.0001181	0.006344	0.02166	0.2694	0.000468	0.1878	0.03936	1
8095269	POLR2B	0.0001183	0.006344	0.0003178	0.05595	0.006372	0.3013	0.5808	1
8102024	UBE2D3	0.0001185	0.006344	0.0007556	0.06914	0.006357	0.3013	0.3119	1
8105714	SREK1	0.0001224	0.006493	0.0002483	0.05313	0.00714	0.3054	0.6199	1
7979044	NIN	0.0001235	0.006493	0.000335	0.05595	0.006104	0.3013	0.5875	1
8106252	HEXB	0.0001239	0.006493	0.0006731	0.06617	0.005563	0.2958	0.4063	1
8081740	ATP6V1A	0.0001256	0.006537	0.009379	0.1772	0.0009886	0.2383	0.1034	1
8129522	MED23	0.0001279	0.006612	0.0001238	0.0433	0.00813	0.3187	0.8073	1
8161906	GNAQ	0.0001314	0.006697	0.003585	0.1176	0.005901	0.3013	0.05777	1
8021984	YES1	0.0001317	0.006697	0.0004084	0.05728	0.002733	0.2518	0.8157	1
8098177	KLHL2	0.0001322	0.006697	0.001876	0.09213	0.007986	0.3187	0.098	1
8046726	SSFA2	0.0001353	0.006809	0.002286	0.09963	0.0138	0.3713	0.02787	1
8020068	ANKRD12	0.0001384	0.006884	0.001056	0.07844	0.005383	0.2957	0.3408	1
8138922	KBTBD2	0.0001386	0.006884	0.0005833	0.06443	0.003709	0.2688	0.6654	1
8108873	ARHGAP26	0.0001399	0.006887	0.004115	0.1241	0.007514	0.3115	0.0324	1
8052654	PELI1	0.0001413	0.006887	0.002097	0.09675	0.006831	0.3021	0.1245	1
8122909	SCAF8	0.0001414	0.006887	0.0006605	0.06617	0.001545	0.2383	0.8718	1
8168678	FAM133A	0.0001426	0.006898	0.0001981	0.05196	0.01869	0.411	0.4117	1
7964413	R3HDM2	0.0001453	0.006945	0.003799	0.1211	0.004103	0.2733	0.1121	1
8040552	NCOA1	0.0001457	0.006945	0.005588	0.1403	0.001559	0.2383	0.1997	1
7916045	EPS15	0.0001463	0.006945	0.0006195	0.06594	0.008212	0.3187	0.4063	1
7935660	DNMBP	0.0001478	0.006972	0.0003454	0.05595	0.002271	0.241	0.9513	1
8020129	VAPA	0.0001487	0.006972	0.003378	0.1149	0.002355	0.241	0.2592	1
8137404	CHPF2	0.0001499	0.006986	0.001226	0.08193	0.00292	0.2521	0.5361	1
8064790	RASSF2	0.0001511	0.006987	0.006747	0.1525	0.001787	0.2383	0.1441	1
7970287	LAMP1	0.0001518	0.006987	0.01124	0.1941	0.00115	0.2383	0.09946	1
8021275	POLI	0.0001552	0.007099	0.0003967	0.05696	0.005012	0.2894	0.7431	1
8063755	C20orf177	0.0001584	0.007135	0.001178	0.0818	0.003004	0.254	0.593	1
8143341	JHDM1D	0.0001586	0.007135	0.00815	0.1673	0.001701	0.2383	0.1252	1
7950838	PICALM	0.0001588	0.007135	0.007547	0.1587	0.004306	0.2733	0.04032	1
7904086	LRIG2	0.0001607	0.007151	0.005863	0.1439	0.002257	0.241	0.1571	1
7941769	KDM2A	0.000161	0.007151	0.0001179	0.04232	0.01609	0.3872	0.7187	1
8071434	CRKL	0.0001623	0.007161	0.0003536	0.05595	0.00437	0.2734	0.8534	1
8041048	FOSL2	0.0001632	0.007161	0.01922	0.2563	0.003655	0.2688	0.004539	1
8102523	FABP2	0.0001661	0.007247	0.004798	0.132	0.04669	0.525	9.486e-05	1
7967255	CLIP1	0.0001679	0.007285	0.0018	0.09197	0.01083	0.3459	0.1221	1
7942839	PCF11	0.0001711	0.007328	0.0007861	0.07055	0.008455	0.3206	0.4	1
7970569	SACS	0.0001718	0.007328	0.0002588	0.05313	0.005397	0.2957	0.8913	1
7978376	STXBP6	0.0001718	0.007328	0.007229	0.1555	0.0006148	0.2207	0.412	1
8140398	YWHAG	0.0001738	0.007372	0.000583	0.06443	0.0104	0.3428	0.4325	1
7909214	RASSF5	0.0001751	0.007384	0.004005	0.1239	0.002584	0.2448	0.2634	1
7990487	SIN3A	0.0001797	0.00749	0.008659	0.1719	0.0006864	0.2212	0.3519	1
8084128	TTC14	0.0001798	0.00749	0.0001394	0.04422	0.01505	0.3753	0.7792	1
7909529	RCOR3	0.0001806	0.00749	0.0004382	0.05735	0.006522	0.3018	0.7201	1
8097417	PHF17	0.0001821	0.007511	0.0004115	0.05728	0.001737	0.2383	0.9918	1
7926565	MLLT10	0.0001838	0.007511	0.0006097	0.06549	0.005298	0.2944	0.6987	1
7936614	EIF3A	0.000185	0.007511	0.001739	0.09125	0.005375	0.2957	0.3459	1
8072757	CSF2RB	0.0001875	0.007511	0.007051	0.1539	0.007093	0.3048	0.03242	1
8159992	ERMP1	0.0001882	0.007511	0.0006569	0.06617	0.006658	0.3018	0.5982	1
8083183	U2SURP	0.0001882	0.007511	0.001161	0.08166	0.007177	0.306	0.3841	1
8070010	SYNJ1	0.0001895	0.007511	0.001403	0.08466	0.006994	0.3038	0.3494	1
7969414	KLF5	0.0001898	0.007511	0.001928	0.09294	0.008508	0.3206	0.2075	1
7987325	AQR	0.0001905	0.007511	0.001428	0.08466	0.004288	0.2733	0.5099	1
8070046	GCFC1	0.000191	0.007511	0.001069	0.07844	0.003645	0.2688	0.6775	1
7989387	VPS13C	0.0001922	0.007516	0.0005253	0.06235	0.02347	0.4428	0.2286	1
8056113	LY75	0.0001935	0.007529	0.0009859	0.07598	0.01199	0.3586	0.2826	1
7975521	RBM25	0.0001956	0.007574	0.0007602	0.06914	0.01449	0.3734	0.3088	1
8108603	HARS2	0.000198	0.007598	0.0001709	0.04758	0.00444	0.274	0.9927	1
7900395	RLF	0.0001992	0.007598	0.001918	0.09278	0.006269	0.3013	0.3079	1
8038427	TSKS	0.0001993	0.007598	0.001871	0.09213	0.009744	0.3402	0.2016	1
8010354	GAA	0.0002047	0.007764	0.00624	0.1478	0.002777	0.2518	0.1862	1
7933947	HERC4	0.0002075	0.007798	0.0007674	0.06933	0.008614	0.3216	0.5529	1
8094948	SLAIN2	0.0002084	0.007798	0.001823	0.09213	0.00525	0.2944	0.4175	1
7908841	PPP1R12B	0.0002095	0.007798	0.03727	0.3432	0.0007835	0.2229	0.02963	1
8136662	MGAM	0.0002104	0.007798	0.00479	0.132	0.007783	0.315	0.0776	1
8088745	FRMD4B	0.0002109	0.007798	0.00888	0.174	0.007029	0.3044	0.02668	1
8156199	DAPK1	0.0002124	0.007798	0.00167	0.09035	0.02392	0.4442	0.07182	1
8002592	AP1G1	0.0002137	0.007798	0.00384	0.1215	0.001908	0.2384	0.4718	1
8017599	PECAM1	0.0002144	0.007798	0.005527	0.1396	0.003187	0.2558	0.2131	1
7942174	PPFIA1	0.0002174	0.007798	0.0023	0.09991	0.003857	0.2706	0.4565	1
8106556	CMYA5	0.0002185	0.007798	0.003341	0.1143	0.004914	0.2894	0.2629	1
8170027	DDX26B	0.0002191	0.007798	0.0002076	0.05313	0.009722	0.3402	0.9061	1
7993478	ABCC1	0.0002198	0.007798	0.0001557	0.04519	0.004496	0.275	0.9992	1
8078479	PDCD6IP	0.0002199	0.007798	0.002158	0.09773	0.007653	0.3126	0.2697	1
8011884	NLRP1	0.00022	0.007798	0.002181	0.09773	0.006404	0.3013	0.3267	1
8049906	ING5	0.0002219	0.007827	0.0002305	0.05313	0.01136	0.353	0.8298	1
7934393	PPP3CB	0.0002255	0.007876	0.0003507	0.05595	0.004876	0.2894	0.9495	1
7958749	SH2B3	0.0002263	0.007876	0.003768	0.1207	0.01638	0.3893	0.03973	1
8027304	ZNF493	0.0002264	0.007876	0.004434	0.1268	0.002333	0.241	0.3931	1
8124553	ZKSCAN4	0.0002301	0.007967	0.0007169	0.06733	0.005879	0.3013	0.7508	1
8056102	CD302	0.0002317	0.007987	0.008655	0.1719	0.003721	0.2688	0.1074	1
7933413	BMS1P1	0.0002357	0.008073	0.02269	0.2738	0.00127	0.2383	0.07119	1
8178727	ATF6B	0.0002363	0.008073	0.0252	0.2886	0.000827	0.2229	0.09856	1
7926851	WAC	0.0002394	0.00814	0.0007206	0.06733	0.005529	0.2958	0.7974	1
7924526	TP53BP2	0.0002478	0.008364	0.001945	0.09342	0.01101	0.3478	0.257	1
7969060	FNDC3A	0.0002483	0.008364	0.001377	0.08459	0.01006	0.3402	0.3824	1
8019463	CSNK1D	0.0002493	0.008364	0.0006887	0.06617	0.006276	0.3013	0.7871	1
7980051	C14orf43	0.0002577	0.008569	0.009687	0.1797	0.003026	0.254	0.1533	1
8120758	SENP6	0.0002586	0.008569	0.002454	0.1039	0.00999	0.3402	0.2335	1
7978997	MAP4K5	0.0002591	0.008569	0.0008343	0.07263	0.01293	0.3684	0.4945	1
7974533	PELI2	0.0002599	0.008569	0.009834	0.1809	0.004932	0.2894	0.0776	1
8153959	DOCK8	0.000263	0.008631	0.005406	0.1387	0.02024	0.4222	0.01931	1
8115783	STK10	0.0002706	0.008814	0.01105	0.1922	0.006703	0.3018	0.04189	1
8063814	LSM14B	0.0002714	0.008814	0.0008399	0.07263	0.01063	0.3434	0.5912	1
8096675	TET2	0.0002721	0.008814	0.005081	0.1351	0.01153	0.3559	0.07651	1
7938592	FAR1	0.0002742	0.008847	0.002958	0.1076	0.02248	0.433	0.0594	1
8071069	IL17RA	0.0002799	0.008929	0.01012	0.1826	0.01416	0.3734	0.01221	1
8165674	SH3KBP1	0.0002819	0.008929	0.009261	0.1762	0.004465	0.2744	0.123	1
8164701	SETX	0.000282	0.008929	0.01568	0.2321	0.002343	0.241	0.1101	1
8119000	MAPK14	0.0002825	0.008929	0.006792	0.1525	0.01013	0.3402	0.06157	1
8079392	CCR2	0.0002843	0.008929	0.008313	0.1693	0.01397	0.3734	0.0217	1
8106354	IQGAP2	0.0002851	0.008929	0.001405	0.08466	0.01853	0.409	0.2481	1
8090351	ZXDC	0.0002854	0.008929	0.002844	0.107	0.01008	0.3402	0.2394	1
8114050	SEPT8	0.0002862	0.008929	0.004661	0.1303	0.007106	0.3048	0.1982	1
8089000	CGGBP1	0.0002902	0.009014	0.001335	0.08431	0.0107	0.3442	0.4771	1
8041913	KLRAQ1	0.0002941	0.009098	0.0006696	0.06617	0.008903	0.3283	0.7897	1
8151890	TP53INP1	0.0002969	0.009147	0.02011	0.2605	0.0008998	0.2361	0.2371	1
8099410	BOD1L	0.0002988	0.009151	0.008895	0.174	0.005836	0.3013	0.1062	1
7986767	C15orf49	0.0003001	0.009151	0.002598	0.1058	0.001808	0.2383	0.8488	1
8067011	ADNP	0.0003009	0.009151	0.0005115	0.06235	0.00465	0.2807	0.9754	1
8053576	RNF103	0.0003018	0.009151	0.00113	0.08029	0.003864	0.2706	0.8774	1
7980338	IRF2BPL	0.0003071	0.009228	0.004188	0.1242	0.006976	0.3038	0.2666	1
8126402	TRERF1	0.0003078	0.009228	0.0003381	0.05595	0.01002	0.3402	0.9306	1
8143088	CNOT4	0.000308	0.009228	0.002184	0.09773	0.007625	0.3124	0.4731	1
8166876	DDX3X	0.0003118	0.009303	0.003729	0.1201	0.01176	0.3582	0.1689	1
8052554	FAM161A	0.0003199	0.009509	0.002205	0.09799	0.001706	0.2383	0.9251	1
8045514	SPOPL	0.0003247	0.009532	0.006045	0.1457	0.008818	0.3269	0.1406	1
7986350	ARRDC4	0.0003268	0.009532	0.01006	0.1823	0.004278	0.2733	0.1597	1
8133788	PTPN12	0.000327	0.009532	0.005135	0.1352	0.009776	0.3402	0.1618	1
8139430	PURB	0.0003276	0.009532	0.001101	0.07985	0.002918	0.2521	0.9703	1
8099760	ARAP2	0.0003288	0.009532	0.001258	0.0821	0.0146	0.3734	0.4428	1
7929511	ENTPD1	0.0003302	0.009532	0.006751	0.1525	0.009903	0.3402	0.1013	1
8063607	RAB22A	0.0003307	0.009532	0.006355	0.1483	0.0025	0.2448	0.4752	1
8019885	SMCHD1	0.0003308	0.009532	0.01968	0.2593	0.01058	0.3429	0.006974	1
8123644	TUBB2A	0.0003379	0.009698	0.004851	0.1324	0.01215	0.3588	0.1339	1
7952707	PRDM10	0.0003403	0.009718	0.002521	0.1045	0.005142	0.2929	0.6327	1
8154151	PPAPDC2	0.0003423	0.009718	0.001027	0.07699	0.005195	0.2929	0.9014	1
8140782	ABCB1	0.0003434	0.009718	0.006797	0.1525	0.002037	0.2406	0.5366	1
8102862	MAML3	0.0003463	0.009718	0.002459	0.1039	0.01339	0.3697	0.2974	1
8131614	AHR	0.0003468	0.009718	0.0006692	0.06617	0.02488	0.4495	0.4757	1
8037433	ZNF45	0.0003468	0.009718	0.0008435	0.07263	0.008402	0.3206	0.8356	1
7966003	APPL2	0.0003487	0.009718	0.003575	0.1176	0.006071	0.3013	0.4421	1
7986383	IGF1R	0.0003489	0.009718	0.001098	0.07985	0.02083	0.4234	0.386	1
8052149	PSME4	0.0003526	0.009786	0.0009469	0.07467	0.003222	0.257	0.9818	1
7966851	TAOK3	0.0003593	0.009936	0.001376	0.08459	0.005504	0.2958	0.8438	1
8021312	WDR7	0.0003632	0.01001	0.001124	0.08029	0.008553	0.3214	0.7798	1
8047248	PLCL1	0.000365	0.01002	0.0005315	0.06235	0.009887	0.3402	0.9169	1
8105191	PARP8	0.0003673	0.01002	0.004378	0.1261	0.006748	0.3018	0.3599	1
8014841	MED1	0.0003717	0.01002	0.001586	0.08831	0.01065	0.3434	0.5644	1
7961767	KIAA0528	0.0003717	0.01002	0.0008906	0.07324	0.01633	0.3888	0.6295	1
8026365	ZNF333	0.0003758	0.01002	0.01566	0.232	0.004987	0.2894	0.08796	1
7970602	PARP4	0.0003766	0.01002	0.0005435	0.06283	0.0283	0.4603	0.5536	1
7957260	GLIPR1	0.0003781	0.01002	0.002714	0.1066	0.01428	0.3734	0.3	1
7925565	HNRNPU	0.0003786	0.01002	0.001232	0.08193	0.008503	0.3206	0.7721	1
7907773	TOR1AIP1	0.0003787	0.01002	0.008907	0.174	0.004326	0.2733	0.257	1
7905444	SNX27	0.0003793	0.01002	0.02108	0.2668	0.004995	0.2894	0.04684	1
8015152	KRT40	0.0003793	0.01002	0.00345	0.116	0.008871	0.328	0.3733	1
8093961	KIAA0232	0.0003803	0.01002	0.003053	0.1102	0.007834	0.3159	0.4603	1
8056545	STK39	0.000381	0.01002	0.0005309	0.06235	0.00655	0.3018	0.9831	1
8041236	SPAST	0.0003826	0.01003	0.00127	0.08253	0.01539	0.3808	0.5209	1
8168345	ACRC	0.0003859	0.01008	0.0002759	0.05377	0.01347	0.3705	0.9688	1
8063785	C20orf197	0.0003883	0.01011	0.001214	0.08193	0.01748	0.3994	0.5091	1
8106784	RASA1	0.0003928	0.01016	0.0008465	0.07263	0.008054	0.3187	0.9046	1
7902822	PKN2	0.0003931	0.01016	0.007343	0.1565	0.01019	0.3402	0.1327	1
8168875	ARMCX3	0.0003942	0.01016	0.0008285	0.07263	0.02159	0.4262	0.5704	1
8078738	OXSR1	0.000396	0.01017	0.0006769	0.06617	0.0136	0.3708	0.8227	1
8052233	C2orf63	0.0003995	0.01022	0.001988	0.0941	0.002756	0.2518	0.9455	1
8025964	ZNF439	0.0004034	0.01028	0.0002688	0.05313	0.01288	0.3683	0.9845	1
7943314	JRKL	0.0004043	0.01028	0.002028	0.09508	0.007548	0.3115	0.6808	1
8041179	CLIP4	0.0004057	0.01028	0.00179	0.09197	0.01485	0.3734	0.4543	1
7954511	STK38L	0.0004082	0.01031	0.004511	0.1279	0.005594	0.2958	0.4828	1
7933115	SEPT7L	0.0004101	0.01032	0.03336	0.3274	0.001473	0.2383	0.1243	1
7935320	TM9SF3	0.0004118	0.01033	0.0002271	0.05313	0.02018	0.4222	0.9459	1
7965652	CDK17	0.0004156	0.01038	0.00285	0.107	0.0117	0.3582	0.4026	1
7935403	ARHGAP19	0.0004165	0.01038	0.002718	0.1066	0.00136	0.2383	0.9875	1
7944667	SORL1	0.0004187	0.0104	0.01258	0.208	0.007367	0.3092	0.09988	1
8107474	DMXL1	0.0004252	0.01052	0.0002639	0.05313	0.0229	0.4356	0.9079	1
8064868	GPCPD1	0.0004276	0.01054	0.003147	0.1117	0.002438	0.2443	0.9015	1
8132013	CHN2	0.0004288	0.01054	0.002744	0.1066	0.01421	0.3734	0.3693	1
8102006	MANBA	0.0004309	0.01056	0.0002681	0.05313	0.01446	0.3734	0.9868	1
8050190	ADAM17	0.0004333	0.01058	0.001015	0.07693	0.00872	0.3241	0.8841	1
7993433	PDXDC1	0.000436	0.01058	0.001331	0.08431	0.006648	0.3018	0.8847	1
7958532	UBE3B	0.000436	0.01058	0.0005315	0.06235	0.003828	0.2706	0.9999	1
8025973	ZNF700	0.0004423	0.01065	0.0008912	0.07324	0.01627	0.3888	0.7359	1
8091863	SLITRK3	0.0004437	0.01065	0.02178	0.2701	0.001462	0.2383	0.3019	1
8045381	CCNT2	0.0004443	0.01065	0.002269	0.09954	0.01484	0.3734	0.4331	1
7942603	MOGAT2	0.0004446	0.01065	0.05901	0.4206	0.001583	0.2383	0.03587	1
7948455	MS4A6A	0.0004482	0.0107	0.00425	0.1244	0.0233	0.441	0.1234	1
7995479	PAPD5	0.0004492	0.0107	0.0004423	0.05735	0.02213	0.4296	0.8328	1
8022531	NPC1	0.0004525	0.01074	0.004746	0.1318	0.007427	0.3108	0.4314	1
8059413	DOCK10	0.0004551	0.01075	0.0009563	0.07498	0.01707	0.3942	0.7241	1
7966046	MTERFD3	0.0004557	0.01075	0.001975	0.0941	0.007764	0.315	0.758	1
8036820	ZNF780A	0.0004626	0.01085	0.002955	0.1076	0.01431	0.3734	0.3913	1
7958216	KIAA1033	0.0004646	0.01085	0.001372	0.08459	0.01553	0.3818	0.6398	1
8174893	THOC2	0.0004652	0.01085	0.003869	0.1217	0.009611	0.34	0.4348	1
8166826	USP9X	0.0004656	0.01085	0.003538	0.1171	0.003528	0.2688	0.8259	1
8070269	DSCR3	0.0004681	0.01085	0.004776	0.132	0.003621	0.2688	0.7109	1
8113733	CEP120	0.0004684	0.01085	0.009467	0.1784	0.007531	0.3115	0.2084	1
8176624	DDX3Y	0.0004725	0.01088	0.0002393	0.05313	0.03954	0.5038	0.7991	1
8169750	STAG2	0.0004725	0.01088	0.0009794	0.07592	0.01455	0.3734	0.7783	1
7968761	NAA16	0.000474	0.01088	0.001251	0.08203	0.0128	0.3675	0.7625	1
7924874	TRIM17	0.0004769	0.0109	0.002453	0.1039	0.005488	0.2958	0.8275	1
8115524	CLINT1	0.0004781	0.0109	0.001401	0.08466	0.01476	0.3734	0.6838	1
7915286	PPT1	0.0004794	0.0109	0.005336	0.1381	0.01269	0.3667	0.2469	1
8058161	ORC2	0.0004818	0.01091	0.002817	0.107	0.004094	0.2733	0.8761	1
7936904	CTBP2	0.0004828	0.01091	0.005507	0.1396	0.01933	0.4172	0.1351	1
7925048	EGLN1	0.0004884	0.011	0.009626	0.1794	0.008236	0.3187	0.1997	1
7984319	MAP2K1	0.0004899	0.011	0.001007	0.07693	0.00827	0.3187	0.9435	1
8116227	CLK4	0.0004912	0.011	0.0008893	0.07324	0.02411	0.4442	0.6391	1
7925201	ARID4B	0.0004978	0.0111	0.02159	0.2694	0.006038	0.3013	0.07715	1
7960165	ZNF268	0.0004984	0.0111	0.0008564	0.07302	0.005847	0.3013	0.9944	1
7936683	TIAL1	0.0004998	0.0111	0.003882	0.1217	0.003712	0.2688	0.8174	1
7974473	FBXO34	0.0005039	0.01116	0.00156	0.08805	0.007705	0.3138	0.8905	1
8110486	ZNF879	0.0005095	0.01125	0.001892	0.09251	0.008041	0.3187	0.8227	1
8017634	DDX5	0.0005123	0.01127	0.001377	0.08459	0.03024	0.4709	0.4235	1
8137437	GALNTL5	0.0005152	0.0113	0.1867	0.7239	0.0007339	0.2212	0.002157	1
8011018	CRK	0.0005162	0.0113	0.006319	0.1483	0.01165	0.3582	0.2594	1
8073943	ZBED4	0.0005229	0.0114	0.004784	0.132	0.006057	0.3013	0.6002	1
8111339	MTMR12	0.0005238	0.0114	0.002854	0.107	0.004989	0.2894	0.8589	1
7985605	ZNF592	0.0005277	0.01145	0.004366	0.1261	0.008628	0.3216	0.5185	1
8022488	ABHD3	0.0005319	0.01147	0.002738	0.1066	0.03309	0.4802	0.1976	1
7975416	PCNX	0.000532	0.01147	0.04963	0.3913	0.002243	0.241	0.06	1
8078187	PLCL2	0.0005361	0.01151	0.0002534	0.05313	0.017	0.3942	0.9985	1
8152222	AZIN1	0.0005369	0.01151	0.00439	0.1261	0.01147	0.3549	0.4222	1
7965606	HAL	0.0005396	0.01154	0.0286	0.3036	0.003692	0.2688	0.1123	1
7928558	ZMIZ1	0.000542	0.01156	0.002767	0.1066	0.01829	0.4066	0.4176	1
8081431	ALCAM	0.0005447	0.01158	0.0006744	0.06617	0.03952	0.5038	0.5889	1
8148049	NOV	0.000548	0.01158	0.0837	0.4971	0.001369	0.2383	0.03032	1
8106141	FCHO2	0.0005485	0.01158	0.01051	0.187	0.005513	0.2958	0.3361	1
8028991	CYP2S1	0.0005492	0.01158	0.03681	0.3426	0.002886	0.2521	0.09412	1
8161988	UBQLN1	0.0005629	0.01179	0.0005185	0.06235	0.0158	0.3842	0.9733	1
8081256	TBC1D23	0.0005652	0.01179	0.0064	0.1487	0.009976	0.3402	0.3614	1
8056977	NFE2L2	0.0005655	0.01179	0.006896	0.153	0.02152	0.4261	0.1214	1
8104506	TRIO	0.0005656	0.01179	0.0005901	0.06443	0.01266	0.3667	0.988	1
7956910	CAND1	0.0005672	0.0118	0.001673	0.09035	0.01004	0.3402	0.86	1
8028266	ZNF540	0.0005698	0.01182	0.0006391	0.06617	0.007316	0.308	0.9998	1
7915160	RRAGC	0.0005753	0.01184	0.003846	0.1215	0.004108	0.2733	0.8706	1
8091658	CCNL1	0.0005757	0.01184	0.005968	0.1446	0.01973	0.4198	0.176	1
8129804	MAP3K5	0.0005757	0.01184	0.008292	0.1693	0.01938	0.4173	0.1131	1
8139632	FIGNL1	0.0005776	0.01185	0.0029	0.1075	0.01314	0.3697	0.5794	1
8094599	KLF3	0.000581	0.01189	0.003821	0.1212	0.009454	0.3385	0.6023	1
8150714	PCMTD1	0.0005866	0.01189	0.003299	0.1143	0.0271	0.4521	0.2586	1
8088247	ARHGEF3	0.0005876	0.01189	0.0005914	0.06443	0.03669	0.4946	0.713	1
8037856	ZC3H4	0.000589	0.01189	0.00118	0.0818	0.005188	0.2929	0.998	1
8172504	GRIPAP1	0.0005894	0.01189	0.05469	0.4087	0.002552	0.2448	0.05434	1
8108217	TGFBI	0.0005919	0.01189	0.002815	0.107	0.03313	0.4802	0.2465	1
8096781	SEC24B	0.0005935	0.01189	0.001799	0.09197	0.01364	0.3708	0.7588	1
8012961	NCOR1	0.000594	0.01189	0.006775	0.1525	0.003677	0.2688	0.7236	1
8162236	SEMA4D	0.0005957	0.01189	0.0007442	0.0686	0.01523	0.3777	0.9446	1
7985166	IREB2	0.0005969	0.01189	0.03685	0.3426	0.003869	0.2706	0.07876	1
7980680	FOXN3	0.0005972	0.01189	0.002378	0.102	0.006302	0.3013	0.9077	1
8111677	LIFR	0.0006016	0.01195	0.04052	0.3568	0.00161	0.2383	0.1954	1
7942520	LOC100287896	0.0006056	0.01199	0.004868	0.1326	0.00352	0.2688	0.8716	1
8063739	PHACTR3	0.0006068	0.01199	0.01719	0.2415	0.002317	0.241	0.4633	1
7908553	PTPRC	0.0006088	0.012	0.002908	0.1075	0.05063	0.5372	0.1243	1
8034334	ZNF20	0.0006104	0.012	0.006295	0.1482	0.006228	0.3013	0.5892	1
8107942	RAD50	0.0006135	0.01201	0.01648	0.2384	0.004555	0.2774	0.2891	1
8046333	CYBRD1	0.0006141	0.01201	0.002577	0.1056	0.03227	0.479	0.303	1
7978739	TRAPPC6B	0.0006173	0.01204	0.003246	0.1138	0.02132	0.4261	0.3868	1
8045090	UGGT1	0.0006225	0.01211	0.0612	0.4271	0.003091	0.2556	0.03485	1
7964555	AVIL	0.0006361	0.01234	0.02206	0.2714	0.002814	0.2518	0.3263	1
8014551	SYNRG	0.0006425	0.01237	0.02006	0.2605	0.005291	0.2944	0.2073	1
7956670	USP15	0.0006443	0.01237	0.05187	0.397	0.006029	0.3013	0.01927	1
8062492	RALGAPB	0.0006458	0.01237	0.01417	0.2196	0.004345	0.2733	0.3914	1
8011324	OR1G1	0.0006459	0.01237	0.00724	0.1555	0.01336	0.3697	0.2899	1
8162352	NOL8	0.0006479	0.01237	0.0008758	0.07324	0.02333	0.441	0.8418	1
8057377	CCDC141	0.0006501	0.01237	0.0007048	0.06712	0.01016	0.3402	0.9978	1
7988286	SPG11	0.0006504	0.01237	0.002278	0.09962	0.01593	0.3859	0.673	1
8120043	RUNX2	0.0006504	0.01237	0.008929	0.174	0.002876	0.2521	0.7536	1
7943231	ANKRD49	0.0006532	0.01239	0.002104	0.09675	0.01744	0.3993	0.6807	1
7917604	ZNF644	0.0006552	0.0124	0.001706	0.0909	0.01498	0.3748	0.8012	1
7906330	CD1D	0.0006646	0.01252	0.004025	0.124	0.04006	0.504	0.1483	1
8043945	MAP4K4	0.0006672	0.01252	0.009757	0.1801	0.01512	0.376	0.1798	1
7925257	LYST	0.0006674	0.01252	0.004576	0.129	0.02201	0.4296	0.3042	1
8095760	THAP6	0.0006685	0.01252	0.00509	0.1351	0.003932	0.2709	0.8737	1
7952022	AMICA1	0.0006803	0.0127	0.01727	0.242	0.02413	0.4442	0.02698	1
7939341	CD44	0.0006821	0.0127	0.001783	0.09197	0.04594	0.5247	0.3413	1
7946610	EIF4G2	0.0006833	0.0127	0.00275	0.1066	0.02657	0.4521	0.4233	1
8099364	ZNF518B	0.0006853	0.01271	0.003876	0.1217	0.003654	0.2688	0.9552	1
8083092	ZBTB38	0.0006874	0.01272	0.006433	0.1489	0.01353	0.3708	0.3646	1
7931951	SFMBT2	0.000689	0.01272	0.0005491	0.06295	0.0304	0.4717	0.8948	1
8035905	ANKRD27	0.0006912	0.01273	0.001665	0.09035	0.009156	0.3349	0.9596	1
7923659	PPP1R15B	0.0006955	0.01277	0.005162	0.1355	0.01835	0.4066	0.3503	1
8019018	CBX4	0.0007002	0.01283	0.006927	0.1532	0.01047	0.3428	0.4466	1
8056798	SP3	0.0007061	0.01289	0.002871	0.107	0.03055	0.4725	0.378	1
7903049	CCDC18	0.0007071	0.01289	0.006784	0.1525	0.006175	0.3013	0.6676	1
8066848	PREX1	0.0007165	0.01303	0.004371	0.1261	0.009918	0.3402	0.6808	1
7959314	SETD1B	0.0007216	0.01309	0.001562	0.08805	0.01358	0.3708	0.9041	1
7966268	GIT2	0.0007258	0.01314	0.004086	0.1241	0.006252	0.3013	0.8679	1
8068974	TRAPPC10	0.0007332	0.01324	0.000793	0.07071	0.03187	0.4783	0.8181	1
8065580	DUSP15	0.000736	0.01325	0.005419	0.1387	0.03133	0.4725	0.1896	1
8147221	OSGIN2	0.0007369	0.01325	0.03836	0.3482	0.003019	0.254	0.1822	1
8129590	STX7	0.0007393	0.01326	0.004232	0.1244	0.0102	0.3402	0.7089	1
8139832	ZNF117	0.0007422	0.01328	0.03838	0.3482	0.01544	0.3808	0.01095	1
8005814	NLK	0.0007468	0.01333	0.000485	0.0607	0.018	0.4045	0.9985	1
7943288	SRSF8	0.0007576	0.01348	0.0004754	0.06005	0.02426	0.4443	0.9842	1
8111552	NADKD1	0.0007608	0.01348	0.01624	0.237	0.003985	0.2718	0.478	1
8150599	PRKDC	0.000762	0.01348	0.01168	0.1992	0.008505	0.3206	0.361	1
8078214	RAB5A	0.0007622	0.01348	0.008549	0.171	0.02098	0.4241	0.1929	1
7945666	CTSD	0.0007652	0.0135	0.03083	0.3146	0.009186	0.335	0.06607	1
8100714	YTHDC1	0.0007686	0.01351	0.001059	0.07844	0.02964	0.4681	0.791	1
8175492	ATP11C	0.0007704	0.01351	0.001332	0.08431	0.01652	0.3914	0.9195	1
7932160	FAM107B	0.0007725	0.01351	0.001209	0.08193	0.01205	0.3588	0.9828	1
8136293	EXOC4	0.000773	0.01351	0.002945	0.1076	0.004165	0.2733	0.9921	1
8051998	MCFD2	0.0007756	0.01352	0.001181	0.0818	0.01754	0.3995	0.9317	1
7971208	KBTBD6	0.000779	0.01353	0.004475	0.1275	0.003831	0.2706	0.9651	1
8017711	GNA13	0.0007797	0.01353	0.002509	0.1045	0.0211	0.4246	0.6574	1
7957177	RAB21	0.0007823	0.01355	0.007501	0.1584	0.01245	0.3641	0.4281	1
7950197	ARAP1	0.0007867	0.01359	0.007209	0.1554	0.01335	0.3697	0.4272	1
7925763	SH3BP5L	0.000793	0.01367	0.001513	0.08673	0.002823	0.2518	0.9884	1
8107129	SLCO4C1	0.0007959	0.01369	0.04126	0.3587	0.01329	0.3697	0.01718	1
8046861	ITGAV	0.0008008	0.01374	0.002598	0.1058	0.02275	0.4352	0.6256	1
8104350	KIAA0947	0.000818	0.014	0.00101	0.07693	0.01295	0.3684	0.9941	1
8055913	PRPF40A	0.0008214	0.01403	0.006348	0.1483	0.04101	0.5065	0.1281	1
7973377	BCL2L2	0.0008337	0.01418	0.05595	0.4126	0.006363	0.3013	0.03675	1
7966135	CORO1C	0.0008346	0.01418	0.03763	0.3441	0.006968	0.3038	0.08536	1
7918157	VAV3	0.0008361	0.01418	0.00144	0.08466	0.02106	0.4244	0.8724	1
7926410	MRC1	0.0008428	0.01426	0.009114	0.1749	0.009268	0.3354	0.5073	1
7916747	JAK1	0.0008478	0.01432	0.008019	0.1657	0.01426	0.3734	0.4017	1
8093398	PCGF3	0.0008538	0.01439	0.001876	0.09213	0.02579	0.4521	0.7374	1
8162086	AGTPBP1	0.0008562	0.01439	0.008789	0.1728	0.01109	0.3495	0.4642	1
8127145	ELOVL5	0.0008592	0.01441	0.002639	0.1066	0.0274	0.4548	0.5938	1
7969935	ERCC5	0.0008637	0.01446	0.0002264	0.05313	0.03709	0.496	0.9993	1
8169519	WDR44	0.0008707	0.01453	0.002717	0.1066	0.03247	0.48	0.5204	1
7974214	KLHDC1	0.000873	0.01453	0.002489	0.1045	0.017	0.3942	0.8151	1
8042291	AFTPH	0.0008746	0.01453	0.002764	0.1066	0.02591	0.4521	0.6097	1
8078227	KAT2B	0.0008765	0.01453	0.006293	0.1482	0.02633	0.4521	0.2906	1
7959604	DDX55	0.0008777	0.01453	0.002375	0.102	0.01833	0.4066	0.806	1
8123006	SYNJ2	0.0008801	0.01454	0.003515	0.1169	0.011	0.3478	0.8578	1
7904158	OLFML3	0.0008838	0.01456	0.02123	0.2682	0.002046	0.2406	0.6764	1
7922162	SLC19A2	0.0008853	0.01456	0.004501	0.1279	0.01053	0.3428	0.7885	1
7965064	OSBPL8	0.0008873	0.01456	0.008667	0.1719	0.02398	0.4442	0.2212	1
7987869	TMEM87A	0.0008898	0.01457	0.00173	0.09125	0.02374	0.4436	0.822	1
7924092	SLC30A1	0.0008939	0.0146	0.002942	0.1076	0.03103	0.4725	0.5289	1
8124459	ZNF322	0.0008965	0.0146	0.005561	0.14	0.009621	0.34	0.7527	1
8146000	ADAM9	0.000899	0.0146	0.01839	0.2499	0.01836	0.4066	0.102	1
8090469	GATA2	0.0008995	0.0146	0.004334	0.1261	0.01607	0.3872	0.6525	1
8056860	WIPF1	0.0009018	0.01461	0.01011	0.1826	0.0284	0.4606	0.1453	1
8083075	ACPL2	0.0009057	0.01464	0.0008978	0.07334	0.01191	0.3582	1	1
7903188	PTBP2	0.0009183	0.01481	0.003128	0.1117	0.02037	0.423	0.7024	1
8161288	CNTNAP3	0.0009233	0.01486	0.06556	0.443	0.004389	0.2734	0.06183	1
7932938	EPC1	0.000925	0.01486	0.006081	0.1461	0.004867	0.2894	0.9274	1
7934812	WAPAL	0.0009288	0.01489	0.005005	0.1339	0.02034	0.423	0.5279	1
7976876	DYNC1H1	0.0009358	0.01497	0.002504	0.1045	0.03465	0.4902	0.5601	1
8064939	TMX4	0.000938	0.01497	0.004164	0.1241	0.009327	0.3366	0.883	1
8006336	LRRC37B	0.0009402	0.01497	0.004212	0.1244	0.02067	0.4234	0.5954	1
8096753	HADH	0.0009436	0.015	0.001619	0.08904	0.026	0.4521	0.8496	1
7902883	LRRC8D	0.0009491	0.01505	0.002641	0.1066	0.01299	0.3684	0.9168	1
7930956	SEC23IP	0.0009517	0.01506	0.01003	0.1823	0.01889	0.4127	0.2873	1
7966052	CRY1	0.0009577	0.01512	0.001756	0.09178	0.01485	0.3734	0.9651	1
8160238	PSIP1	0.0009704	0.01523	0.001069	0.07844	0.01958	0.418	0.9884	1
7969576	MIR17HG	0.0009709	0.01523	0.001513	0.08673	0.02124	0.4257	0.9312	1
8059739	NPPC	0.0009714	0.01523	0.1649	0.6848	0.002631	0.2459	0.006874	1
8085815	TOP2B	0.0009727	0.01523	0.001728	0.09125	0.02366	0.4434	0.8747	1
8133860	GNAI1	0.000975	0.01524	0.004141	0.1241	0.003888	0.2706	0.9981	1
7916282	LRP8	0.0009824	0.01532	0.002153	0.09773	0.006881	0.3028	0.9997	1
8164002	ZBTB26	0.0009852	0.01533	0.002567	0.1055	0.0104	0.3428	0.9694	1
8003116	HSDL1	0.0009915	0.0154	0.00926	0.1762	0.01101	0.3478	0.5614	1
8170364	AFF2	0.0009946	0.01541	0.0295	0.3091	0.01302	0.3684	0.09171	1
8086482	ZNF445	0.000996	0.01541	0.00328	0.1143	0.01753	0.3995	0.7965	1
7978428	STRN3	0.0009982	0.01541	0.007445	0.1582	0.01949	0.4176	0.4263	1
