# Supplementary material for: Characteristics and Predictive Value of Blood Transcriptome Signature in Males with Autism Spectrum Disorders
Source: PLoS One. 2012 Dec 5;7(12):e49475. doi: 10.1371/journal.pone.0049475 (PMC3515554; doi:10.1371/journal.pone.0049475)
Supplement: Table S3 — Top 6 clusters of Gene Ontology biological process terms enriched for differentially expressed genes in P1 data set. (XLS) [file pone.0049475.s007.xls]

## Sheet: Sheet1
Table S3. Top 6 clusters of Gene Ontology biological process terms enriched for differentially expressed genes in P1 data set.
Pathway Cluster	Term	Count	EASE score P	FDR (%)	Genes
Cluster 1: Enrichment Score: 4.47	GO:0006793 phosphorus metabolic process	50	1.85e-05	0.031	C20ORF57, CDK17, STK38, SYNJ1, HK2P1, MAP3K5, COL4A3BP, CLK4, SYNJ2, STK39, ADAM9, ADAM10, PAN3, ROCK1, PIK3CB, PIK3CD, ND3, PKN2, DAPK1, MTMR12, MAPK1, ATP6V1A, MAP4K4, MAP4K5, SCYL2, MTMR10, HIPK3, MAPK8, STK10, SSH2, HK2, PRKDC, PPM1B, IGF1R, SNRK, DUSP15, PPP3CB, YES1, STK38L, PTPRC, PTPRE, MAP2K1, NIN, NLK, TAOK3, TRIO, OXSR1, PTPN12, RPS6KA3, CSNK1D, ROCK1P1, MAPK14, JAK1, LOC731751
	GO:0006796 phosphate metabolic process	50	1.85e-05	0.031	C20ORF57, CDK17, STK38, SYNJ1, HK2P1, MAP3K5, COL4A3BP, CLK4, SYNJ2, STK39, ADAM9, ADAM10, PAN3, ROCK1, PIK3CB, PIK3CD, ND3, PKN2, DAPK1, MTMR12, MAPK1, ATP6V1A, MAP4K4, MAP4K5, SCYL2, MTMR10, HIPK3, MAPK8, STK10, SSH2, HK2, PRKDC, PPM1B, IGF1R, SNRK, DUSP15, PPP3CB, YES1, STK38L, PTPRC, PTPRE, MAP2K1, NIN, NLK, TAOK3, TRIO, OXSR1, PTPN12, RPS6KA3, CSNK1D, ROCK1P1, MAPK14, JAK1, LOC731751
	GO:0006468 protein amino acid phosphorylation	38	2.82e-05	0.048	CDK17, STK38, STK10, PRKDC, IGF1R, MAP3K5, SNRK, COL4A3BP, CLK4, STK39, YES1, STK38L, ADAM9, PTPRC, ADAM10, PAN3, PTPRE, MAP2K1, ROCK1, NIN, PIK3CB, NLK, TAOK3, PIK3CD, PKN2, TRIO, OXSR1, DAPK1, MAPK1, MAP4K4, RPS6KA3, MAP4K5, CSNK1D, ROCK1P1, SCYL2, MAPK14, HIPK3, LOC731751, JAK1, MAPK8
	GO:0016310 phosphorylation	41	0.000134	0.227	CDK17, STK38, STK10, HK2, PRKDC, HK2P1, IGF1R, MAP3K5, SNRK, COL4A3BP, CLK4, STK39, YES1, STK38L, ADAM9, PTPRC, ADAM10, PAN3, PTPRE, MAP2K1, NIN, ROCK1, PIK3CB, NLK, TAOK3, PIK3CD, ND3, PKN2, TRIO, OXSR1, DAPK1, MAPK1, MAP4K4, ATP6V1A, MAP4K5, RPS6KA3, CSNK1D, ROCK1P1, SCYL2, MAPK14, HIPK3, LOC731751, JAK1, MAPK8
Cluster 2: Enrichment Score: 3.74	GO:0006350 transcription	92	2.05e-06	0.003	CCNT2, ZNF292, ZNF518B, ARID4B, CBX4, ZXDC, ZNF12, MED23, PNN, ZBTB38, PMS2L3, ZKSCAN4, CNOT4, EPC1, GATA2, PCGF3, SIN3A, CGGBP1, AHCTF1P1, ATF6B, PSIP1, ZNF540, ZNF879, ZNF445, CRY1, MLL3, MTERFD3, ZNF493, ZNF33A, ZNF548, ZNF45, ZNF592, ZNF354A, ZNF644, RBL2, RCOR3, ZNF507, ADNP, CCNL1, ZNF333, ZBTB26, C14ORF43, TRERF1, AHR, FOXN3, PURB, NCOA1, ZNF439, KDM2A, ZNF238, HIPK3, ZMIZ1, NCOA6, CAND1, …
	GO:0045449 regulation of transcription	105	1.19e-05	0.02	ZXDC, CBX4, NAA16, MED23, PNN, CNOT4, GATA2, EPC1, SIN3A, CGGBP1, ATF6B, PSIP1, ZNF445, MLL3, CRY1, MTERFD3, ZNF45, ZNF592, TIGD1, RBL2, ZNF644, RCOR3, ZNF507, STRN3, C14ORF43, TRERF1, FOXN3, AHR, MAPK1, ZNF439, ZNF238, KDM2A, TIAL1, NFE2L2, ZNF516, SETD1B, ZNF514, MAML3, RUNX2, KLF5, MAP2K1, CREBZF, MAML1, CREBBP, JRKL, TFCP2, DDX5, ZBTB44, SFMBT2, GCFC1, ZNF217, ZNF117, NCOR1, KLF3, CCNT2, ZNF2…
	GO:0051252 regulation of RNA metabolic process	68	0.00475	7.772	FOSL2, CBX4, ZNF12, NAA16, MED23, ZKSCAN4, PMS2L3, ZBTB38, GATA2, EPC1, SIN3A, ATF6B, ZNF540, ZNF879, ZNF445, MLL3, ZNF493, ZNF33A, ZNF548, ZNF45, CTBP2, ZNF354A, STRN3, ADNP, ZNF333, TRERF1, AHR, FOXN3, HNRNPU, PURB, IFNAR2, NCOA1, ZNF439, ZNF238, TIAL1, ZMIZ1, NCOA6, CAND1, JMJD1C, NFE2L2, MED1, PRKDC, NFYA, ZNF514, ZNF780A, ZFP36L2, ORC2L, MAML3, ZNF268, RUNX2, ZNF700, MYSM1, RASA1, KLF5, KAT2…
	GO:0006355 regulation of transcription, DNA-dependent	65	0.0098	15.398	FOSL2, CBX4, ZNF12, NAA16, MED23, ZKSCAN4, PMS2L3, ZBTB38, GATA2, EPC1, SIN3A, ATF6B, ZNF540, ZNF879, ZNF445, MLL3, ZNF493, ZNF33A, ZNF45, ZNF548, CTBP2, ZNF354A, STRN3, ADNP, ZNF333, TRERF1, AHR, FOXN3, PURB, IFNAR2, NCOA1, ZNF439, ZNF238, TIAL1, ZMIZ1, NCOA6, CAND1, JMJD1C, NFE2L2, MED1, PRKDC, NFYA, ZNF514, ZNF780A, ORC2L, MAML3, ZNF268, RUNX2, ZNF700, MYSM1, KLF5, KAT2B, CREBZF, MAP2K1, MAML1…
Cluster 3: Enrichment Score: 3.21	GO:0016044 membrane organization	24	0.000298	0.505	SEC24B, STX7, VAPA, AP1G1, SORL1, SYNJ1, PPT1, CLTC, GATA2, CD9, DOCK2, PICALM, ITGAV, CLINT1, MRC1, LY75, SYNRG, VAV3, CORO1C, NPC1, RAB22A, RAB5A, LRMP, LRP8, CD302
	GO:0016192 vesicle-mediated transport	31	0.000488	0.826	SEC24B, STX7, AP1G1, SORL1, SYNJ1, PPT1, CLTC, ARFGEF1, GATA2, PICALM, TRAPPC6B, ZFYVE16, ITGAV, EXOC4, CLINT1, MRC1, LY75, SYNRG, VAV3, CORO1C, ANKRD27, NPC1, STXBP6, LYST, MCFD2, RAB22A, RAB5A, LRMP, LRP8, CD302, SPAST, TRAPPC10
	GO:0006897 endocytosis	16	0.000992	1.671	LY75, MRC1, SYNRG, AP1G1, SYNJ1, SORL1, PPT1, CORO1C, GATA2, NPC1, PICALM, ITGAV, RAB22A, RAB5A, LRP8, CD302, CLINT1
	GO:0010324 membrane invagination	16	0.000992	1.671	LY75, MRC1, SYNRG, AP1G1, SYNJ1, SORL1, PPT1, CORO1C, GATA2, NPC1, PICALM, ITGAV, RAB22A, RAB5A, LRP8, CD302, CLINT1
Cluster 4: Enrichment Score: 1.94	GO:0045935 positive regulation of nucleobase, nucleoside, nucleotide and nucleic acid metabolic process	31	0.0017	2.903	ING5, ZXDC, NAA16, PRKDC, NFYA, ZBTB38, GATA2, EPC1, IGF1R, MAML3, RUNX2, MYSM1, KLF5, PTPRC, MAP2K1, STRN3, MAML1, CREBBP, DDX5, TRERF1, AHR, MAPK1, NCOA1, MAPK14, ZMIZ1, ATXN7, NCOA6, NPPC, LOC731751, CAND1, NFE2L2, MED1
	GO:0051173 positive regulation of nitrogen compound metabolic process	31	0.0028	4.632	ING5, ZXDC, NAA16, PRKDC, NFYA, ZBTB38, GATA2, EPC1, IGF1R, MAML3, RUNX2, MYSM1, KLF5, PTPRC, MAP2K1, STRN3, MAML1, CREBBP, DDX5, TRERF1, AHR, MAPK1, NCOA1, MAPK14, ZMIZ1, ATXN7, NCOA6, NPPC, LOC731751, CAND1, NFE2L2, MED1
	GO:0045941 positive regulation of transcription	27	0.006	9.693	ING5, ZXDC, NAA16, PRKDC, NFYA, ZBTB38, GATA2, EPC1, MAML3, RUNX2, MYSM1, KLF5, MAML1, STRN3, CREBBP, DDX5, TRERF1, AHR, MAPK1, NCOA1, MAPK14, ATXN7, ZMIZ1, NCOA6, LOC731751, CAND1, NFE2L2, MED1
	GO:0010628 positive regulation of gene expression	27	0.0086	13.697	ING5, ZXDC, NAA16, PRKDC, NFYA, ZBTB38, GATA2, EPC1, MAML3, RUNX2, MYSM1, KLF5, MAML1, STRN3, CREBBP, DDX5, TRERF1, AHR, MAPK1, NCOA1, MAPK14, ATXN7, ZMIZ1, NCOA6, LOC731751, CAND1, NFE2L2, MED1
	GO:0051254 positive regulation of RNA metabolic process	23	0.012	18.519	MAP2K1, STRN3, MAML1, CREBBP, PRKDC, NAA16, NFYA, TRERF1, AHR, ZBTB38, EPC1, GATA2, NCOA1, ZMIZ1, MAPK14, ATXN7, NCOA6, LOC731751, CAND1, MAML3, NFE2L2, RUNX2, MYSM1, MED1
	GO:0006357 regulation of transcription from RNA polymerase II promoter	31	0.015	21.979	FOSL2, CBX4, PRKDC, MED23, NFYA, ZBTB38, GATA2, EPC1, ORC2L, SIN3A, MAML3, RUNX2, ZNF354A, MAP2K1, STRN3, MAML1, CREBBP, TFCP2, AHR, IFNAR2, NCOA1, ZNF238, MAPK14, ZMIZ1, ATXN7, TIAL1, NCOA6, LOC731751, CAND1, CRK, NCOR1, MED1
	GO:0010557 positive regulation of macromolecule biosynthetic process	28	0.02	29.025	ING5, ZXDC, NAA16, PRKDC, NFYA, ZBTB38, GATA2, EPC1, IGF1R, MAML3, RUNX2, MYSM1, KLF5, MAML1, STRN3, CREBBP, DDX5, TRERF1, AHR, MAPK1, NCOA1, MAPK14, ZMIZ1, ATXN7, NCOA6, LOC731751, CAND1, NFE2L2, MED1
	GO:0045893 positive regulation of transcription, DNA-dependent	22	0.02	29.418	STRN3, MAML1, CREBBP, PRKDC, NAA16, NFYA, TRERF1, AHR, ZBTB38, EPC1, GATA2, NCOA1, ZMIZ1, MAPK14, ATXN7, NCOA6, LOC731751, CAND1, MAML3, NFE2L2, RUNX2, MYSM1, MED1
	GO:0031328 positive regulation of cellular biosynthetic process	29	0.02	29.611	ING5, ZXDC, NAA16, PRKDC, NFYA, ZBTB38, GATA2, EPC1, IGF1R, MAML3, RUNX2, MYSM1, KLF5, MAML1, STRN3, CREBBP, DDX5, TRERF1, AHR, MAPK1, NCOA1, MAPK14, ZMIZ1, ATXN7, NCOA6, NPPC, LOC731751, CAND1, NFE2L2, MED1
	GO:0009891 positive regulation of biosynthetic process	29	0.024	33.467	ING5, ZXDC, NAA16, PRKDC, NFYA, ZBTB38, GATA2, EPC1, IGF1R, MAML3, RUNX2, MYSM1, KLF5, MAML1, STRN3, CREBBP, DDX5, TRERF1, AHR, MAPK1, NCOA1, MAPK14, ZMIZ1, ATXN7, NCOA6, NPPC, LOC731751, CAND1, NFE2L2, MED1
	GO:0045944 positive regulation of transcription from RNA polymerase II promoter	18	0.025	34.407	MAML1, STRN3, CREBBP, PRKDC, NFYA, AHR, ZBTB38, EPC1, GATA2, NCOA1, ZMIZ1, MAPK14, ATXN7, NCOA6, LOC731751, CAND1, MAML3, RUNX2, MED1
	GO:0010604 positive regulation of macromolecule metabolic process	34	0.027	36.811	ING5, ZXDC, PRKDC, NAA16, NFYA, ZBTB38, GATA2, EPC1, IGF1R, MAML3, RUNX2, MYSM1, ADAM9, KLF5, PTPRC, MAP2K1, STRN3, MAML1, CREBBP, IL6R, RICTOR, DDX5, TRERF1, AHR, MAPK1, NCOA1, ZMIZ1, MAPK14, ATXN7, NCOA6, LOC731751, ADAM17, CAND1, NFE2L2, MED1
Cluster 5: Enrichment Score: 1.79	GO:0051056 regulation of small GTPase mediated signal transduction	19	0.000181	0.307	ARHGEF3, NGEF, VAV3, MAP2K1, PREX1, RALGAPB, IQGAP2, TRIO, RICTOR, ARFGEF1, DNMBP, TBC1D23, TBC1D14, GIT2, CRK, ARAP2, SPATA13, ARAP1, RASA1
	GO:0046578 regulation of Ras protein signal transduction	16	0.000615	1.04	ARHGEF3, NGEF, VAV3, MAP2K1, PREX1, TRIO, RICTOR, ARFGEF1, DNMBP, TBC1D23, TBC1D14, GIT2, CRK, ARAP2, SPATA13, ARAP1
	GO:0035023 regulation of Rho protein signal transduction	9	0.0055	8.862	ARHGEF3, NGEF, VAV3, PREX1, TRIO, RICTOR, SPATA13, ARAP1, DNMBP
	GO:0043087 regulation of GTPase activity	9	0.019	27.581	TBC1D23, VAV3, MAP2K1, RAB3GAP1, TBC1D14, GIT2, RICTOR, ARAP2, ARAP1
	GO:0032318 regulation of Ras GTPase activity	7	0.064	67.231	TBC1D23, MAP2K1, TBC1D14, GIT2, RICTOR, ARAP2, ARAP1
	GO:0032012 regulation of ARF protein signal transduction	4	0.12	87.775	GIT2, ARFGEF1, ARAP2, ARAP1
	GO:0032312 regulation of ARF GTPase activity	3	0.18	96.221	GIT2, ARAP2, ARAP1
	GO:0051336 regulation of hydrolase activity	12	0.31	99.801	GNA13, TBC1D23, VAV3, GNAQ, MAP2K1, RAB3GAP1, TBC1D14, GIT2, RICTOR, ARAP2, NLRP1, ARAP1
Cluster 6: Enrichment Score: 1.52	GO:0043543 protein amino acid acylation	7	0.0056	9.064	ING5, EPC1, PHF17, ZDHHC17, KAT2B, CREBBP, NAA16
	GO:0016568 chromatin modification	16	0.008	12.634	ING5, KAT2B, RBL2, UTY, SETD1B, CREBBP, CBX4, PHF17, EPC1, KDM2A, ATXN7, MSL1, JMJD1C, MLL3, NCOR1, MYSM1
	GO:0006473 protein amino acid acetylation	6	0.013	20.039	ING5, EPC1, PHF17, KAT2B, CREBBP, NAA16
	GO:0006474 N-terminal protein amino acid acetylation	3	0.014	21.402	KAT2B, CREBBP, NAA16
	GO:0016573 histone acetylation	5	0.041	50.597	ING5, EPC1, PHF17, KAT2B, CREBBP
	GO:0051276 chromosome organization	21	0.042	51.515	ING5, KAT2B, SMCHD1, RBL2, UTY, SETD1B, CREBBP, ARID4B, CBX4, PRKDC, RAD50, EPC1, PHF17, NIPBL, KDM2A, ATXN7, MSL1, LOC731751, JMJD1C, MLL3, NCOR1, MYSM1
	GO:0006325 chromatin organization	17	0.053	60.502	ING5, KAT2B, RBL2, UTY, SETD1B, CREBBP, ARID4B, CBX4, PHF17, EPC1, KDM2A, ATXN7, MSL1, JMJD1C, MLL3, NCOR1, MYSM1
	GO:0031365 N-terminal protein amino acid modification	3	0.054	60.945	KAT2B, CREBBP, NAA16
	GO:0016570 histone modification	7	0.11	87.323	ING5, EPC1, PHF17, KAT2B, ATXN7, CREBBP, MYSM1
	GO:0016569 covalent chromatin modification	7	0.13	90.232	ING5, EPC1, PHF17, KAT2B, ATXN7, CREBBP, MYSM1
