# Supplementary material for: Characteristics and Predictive Value of Blood Transcriptome Signature in Males with Autism Spectrum Disorders
Source: PLoS One. 2012 Dec 5;7(12):e49475. doi: 10.1371/journal.pone.0049475 (PMC3515554; doi:10.1371/journal.pone.0049475)
Supplement: Table S4 — The predictor genes for final prediction model. The differentially expressed genes were ranked by AUC, and top 55 genes were selected to build the final prediction model. Affymetrix IDs represent the transcript IDs of Gene ST 1.0 array. Welch's t-tests were used to calculate p-values, and false discovery rates (FDR) were calculated as described in Storey and Tibshirani. (XLS) [file pone.0049475.s008.xls]

## Sheet: Sheet1
Table S4. The predictor genes for final prediction model.
Affymetrix ID	Gene	Area under the ROC curve	Welch's t-test p-value	False discovery rate (%)
8066822	SULF2	0.805	9.3e-07	0.11
8177137	UTY	0.799	4.4e-07	0.11
8138116	ZNF12	0.792	1e-06	0.11
8152988	SLA	0.79	6.5e-07	0.11
7975361	KIAA0247	0.789	9e-07	0.11
8051814	ZFP36L2	0.781	1.13e-06	0.11
8043310	RMND5A	0.78	6.24e-06	0.22
7931353	PTPRE	0.78	5.5e-07	0.11
8151149	ARFGEF1	0.779	1.16e-06	0.11
8059596	TRIP12	0.779	1.76e-06	0.13
7953291	CD9	0.779	2.865e-05	0.37
8138670	HNRNPA2B1	0.778	4.09e-06	0.18
7987048	MTMR10	0.778	1.85e-06	0.13
8115562	RNF145	0.777	3.52e-06	0.18
7995631	RBL2	0.776	1.69e-06	0.13
8060418	SIRPA	0.776	9.08e-06	0.25
8054135	MGAT4A	0.775	5.38e-06	0.21
8065776	NCOA6	0.774	8.94e-06	0.25
7922889	IVNS1ABP	0.774	4.03e-06	0.18
8093976	TBC1D14	0.772	3.88e-06	0.18
7957277	ZDHHC17	0.772	5.87e-06	0.22
7969651	DNAJC3	0.771	9.52e-06	0.25
8120992	ZNF292	0.769	4.54e-06	0.19
8128394	PNISR	0.768	8.89e-06	0.25
7974066	PNN	0.767	1.815e-05	0.31
8073733	NUP50	0.763	8.27e-06	0.25
8174119	ZMAT1	0.763	2.377e-05	0.33
8022441	ROCK1	0.762	1.478e-05	0.29
7950409	KCNE3	0.762	2.144e-05	0.31
8013965	SSH2	0.761	2.132e-05	0.31
8079140	SNRK	0.761	1.898e-05	0.31
8126018	STK38	0.761	9.14e-06	0.25
8068238	IFNAR2	0.761	1.059e-05	0.25
7989224	ADAM10	0.759	1.028e-05	0.25
8009205	DDX42	0.759	1.432e-05	0.29
8048980	CAB39	0.759	1.656e-05	0.31
8144317	KBTBD11	0.758	1.927e-05	0.31
8066417	SERINC3	0.757	6.57e-06	0.23
8119000	MAPK14	0.757	0.0002825	0.89
8098177	KLHL2	0.756	0.00013219	0.67
8050128	KIDINS220	0.756	1.988e-05	0.31
8157534	CNTRL	0.755	1.872e-05	0.31
8161701	TMEM2	0.754	5.385e-05	0.48
8112687	COL4A3BP	0.754	1.227e-05	0.27
7999044	CREBBP	0.752	3.472e-05	0.4
8171762	RPS6KA3	0.752	1.432e-05	0.29
8163775	MEGF9	0.751	4.637e-05	0.46
8167971	MIR223	0.751	5.968e-05	0.5
8023882	ZNF516	0.751	4.656e-05	0.46
7986132	MAN2A2	0.751	7.207e-05	0.53
7948667	AHNAK	0.751	8.217e-05	0.54
8079462	NBEAL2	0.75	1.967e-05	0.31
8099410	BOD1L	0.75	0.0002988	0.92
8031737	ZNF548	0.75	4.914e-05	0.47
7988921	MYO5A	0.75	1.438e-05	0.29
