# Supplementary material for: Characteristics and Predictive Value of Blood Transcriptome Signature in Males with Autism Spectrum Disorders
Source: PLoS One. 2012 Dec 5;7(12):e49475. doi: 10.1371/journal.pone.0049475 (PMC3515554; doi:10.1371/journal.pone.0049475)
Supplement: Table S5 — Prediction performance of ASD55 using various machine learning algorithms. ASD55 denotes the genes in a classifier developed on P1 with 55 genes (Table S4). The average prediction performances from 100-repeated leave-group out cross validations using the P1 dataset are shown. For each prediction instance, 20% of ASD cases (N = 13) and 20% of controls (N = 7) were randomly selected for a testing set, and the other 80% of samples served as a training set. This procedure was repeated 100 times to calculate the average performance of ASD55 with 6 machine learning algorithms listed below. The overall performance of PLS was comparable to the other 5 methods. The sensitivities were relatively higher than the specificities across different methods except for the Naïve Bayes classifier. (AUC: Area under the receiver operation characteristics curve, ACC: Accuracy, SENS: Sensitivity, SPEC: Specificity, PPV: Positive Predictive Value, NPV: Negative Predictive Value). (XLS) [file pone.0049475.s009.xls]

## Sheet: Sheet1
Table S5. Prediction performance of ASD55 using various machine learning algorithms.
Machine learning method	AUC	ACC (%)	SENS (%)	SPEC (%)	PPV (%)	NPV (%)
Partial Least Squares	0.851	77.4	85.5	62.3	81.3	72.1
Logistic Regression	0.761	71.4	76.5	61.2	79.8	56.7
Naïve Bayes	0.805	74.4	73.8	75.6	85.8	59
kNN (k=5)	0.763	77.3	90	51.9	78.9	72.1
Random Forest	0.771	74.2	87.8	47.1	76.9	66.1
Support Vector Machine	0.765	79.5	85.5	67.6	84.1	70
AUC: Area under the receiver operation characteristics curve, ACC: Accuracy, SENS: Sensitivity, SPEC: Specificity, PPV: Positive Predictive Value, NPV: Negative Predictive Value
